# Supplementary material for: Soil infiltration characteristics and pore distribution under freezing-thawing conditions
Source: Copernicus journal article supplement (doi:10.5194/tc-2020-280), 2020-10-27

### Soil porosity (%) of three kind of soils

| Soil types  | Sample 1 | Sample 2 | Sample 3 | AVE   |
|-------------|----------|----------|----------|-------|
| Black soil  | 53.83    | 52.97    | 51.49    | 52.76 |
| Meadow soil | 53.25    | 52.47    | 52.74    | 52.82 |
| chernozem   | 53.44    | 52.70    | 53.53    | 53.22 |

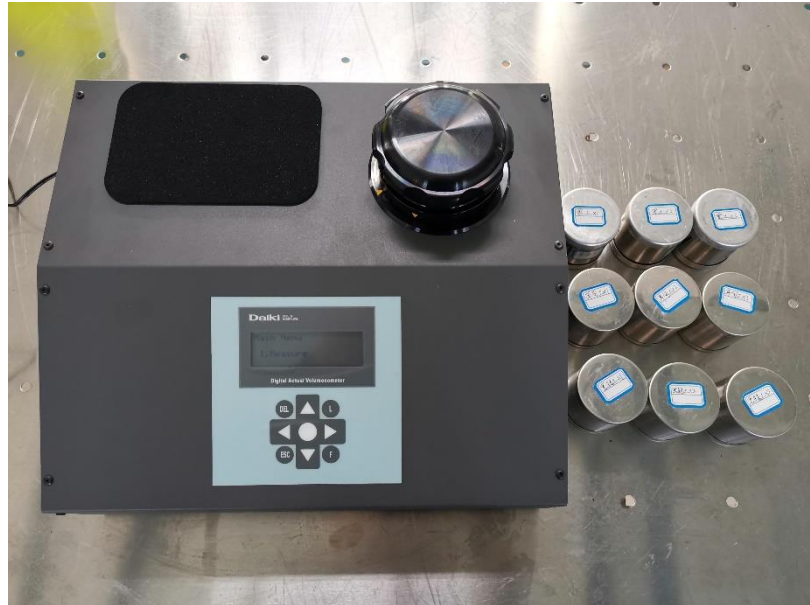

DAIKI Location Manager - Data Detail View

No.  Date  GPS

Total Volume Vt  Actual Volume V

Total Weight W  (Gross Weight  -Sampling Tube Weight

Solid Weight S  (Gross Solid Weight  -Sampling Tube Weight

True Density d  ☐ Input the True Density Moisture Weight M

Air Volume Va  Air Ratio A

Solid Volume Vs  Solid Ratio Sv

Liquid Volume Vl  Moisture Ratio Mw

Total Pore Space p  Porosity P  Void Ratio

Saturation H  Unfilled percentage U  Water-Solid Ratio

Solid Moisture percentage by dried base Mo

Solid Moisture percentage by wetted base Mm

Note

LinkFile

**Unfrozen water contents and ice contents of the soil samples**

| Soil types  | Unfrozen water contents ( $\text{cm}^3/\text{cm}^3$ ) |       | Ice contents ( $\text{cm}^3/\text{cm}^3$ ) |       |
|-------------|-------------------------------------------------------|-------|--------------------------------------------|-------|
|             | -5°C                                                  | -10°C | -5°C                                       | -10°C |
| Black soil  | 0.123                                                 | 0.101 | 0.159                                      | 0.179 |
| Meadow soil | 0.128                                                 | 0.109 | 0.145                                      | 0.167 |
| chernozem   | 0.119                                                 | 0.097 | 0.151                                      | 0.185 |

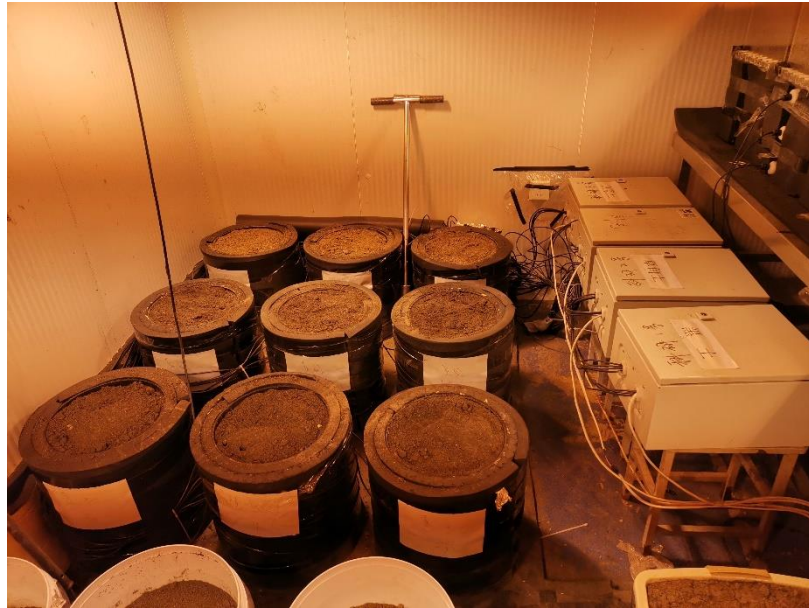

Supplement: Supplementary file [file tc-2020-280-AC1-supplement.zip]
